# Supplementary material
Source: PubMed Central journal article supplement (PMC6488306)
Supplement: NIHMS1509345-supplement-2.pdf [file NIHMS1509345-supplement-2.pdf]

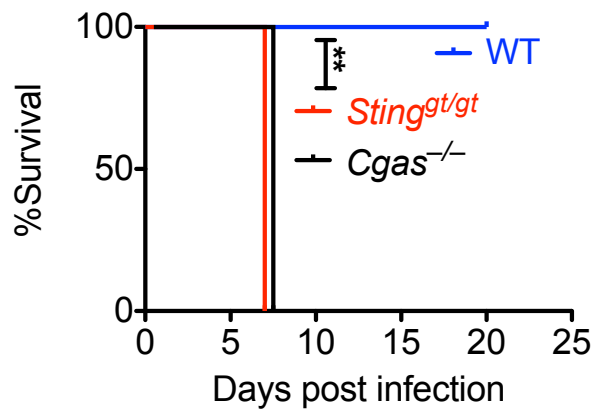

**Figure S1. Validation of *Cgas*<sup>-/-</sup> mice. Related to Figure 4.**

WT, *Sting*<sup>gt/gt</sup>, *Cgas*<sup>-/-</sup> mice were infected with 10<sup>7</sup> PFU HSV-1 intravenously, and monitored for survival. Statistical analysis was assessed using the log-rank test. Results are representative of two independent experiments.

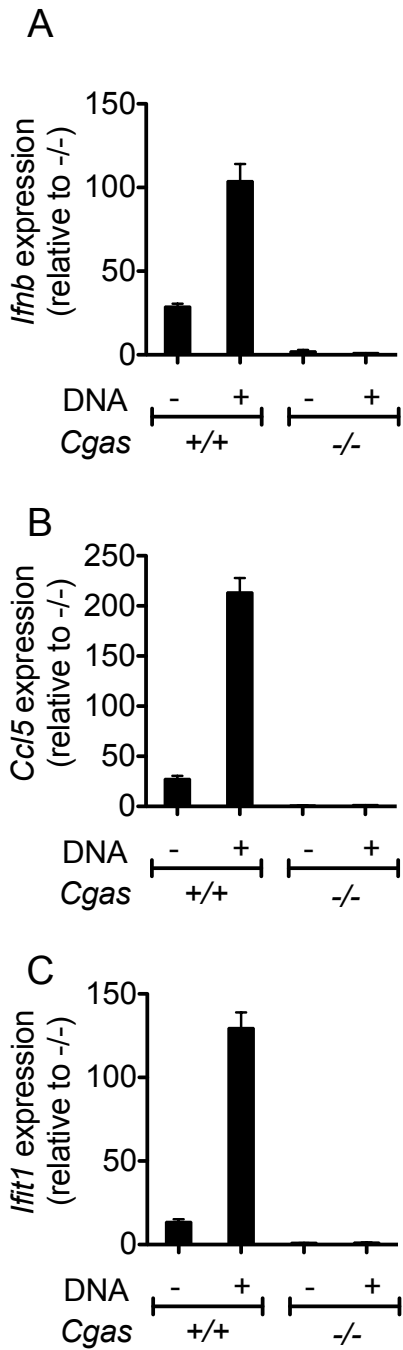

**Figure S2. Validation of B16  $Cgas^{-/-}$  tumor cells. Related to Figure 6.** B16- $Cgas^{+/+}$  and B16- $Cgas^{-/-}$  cells were transfected with HT-DNA, and assayed for *Ifnb*, *Ccl5* and *Ifit1* gene expression using Q-RT-PCR. Fold expression is shown relative to  $Cgas^{-/-}$  cells. Results are representative of two to four independent experiments, and data consist of three technical replicates. Bars represent means  $\pm$  SEM.

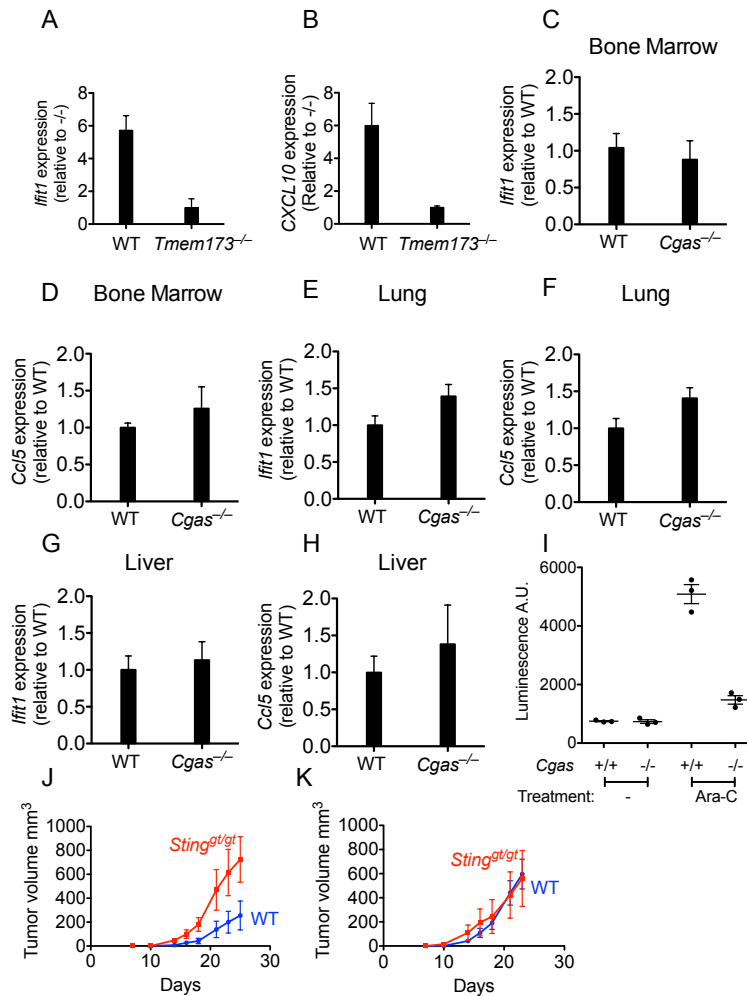

**Figure S3. Activation of CGAS-STING in tumors *in vitro* and *in vivo*. Related to Figure 6.**

(A-B) QRT-PCR analysis of *IFIT1* (A) and *CXCL10* (B) expression levels in THP1-*TMEM173*<sup>+/+</sup>, and THP1-*TMEM173*<sup>-/-</sup> tumor cells. Results are representative of two independent experiments, and data consist of three technical replicates. QRT-PCR analysis of *Ccl5* and *Ifit1* expression levels in bone marrow (C-D), Lung (E-F), and Liver (G-H) cells isolated from WT or *Cgas*<sup>-/-</sup> mice (I) B16-*Cgas*<sup>+/+</sup> and B16-*Cgas*<sup>-/-</sup> cells were incubated in media with or without 50μM ARA-C, and after 48 hours secreted type I IFN was measured using an IFN bioassay. Tumor cells (10<sup>5</sup>) were injected s.c. into WT or *Sting*<sup>gt/gt</sup> mice and tumor growth monitored as in Fig. 1 legend. Each group contained 4-6 mice, and results are representative of two independent experiments. Injected tumor cells were: B16-BL6-*Cgas*<sup>-/-</sup> cells transduced with active (*Cgas*<sup>wt</sup>, J), or inactive (*Cgas*<sup>mut</sup>, K) CGAS expression vector. Bars represent means +/- SEM. Statistical analysis was done as in Fig. 1.

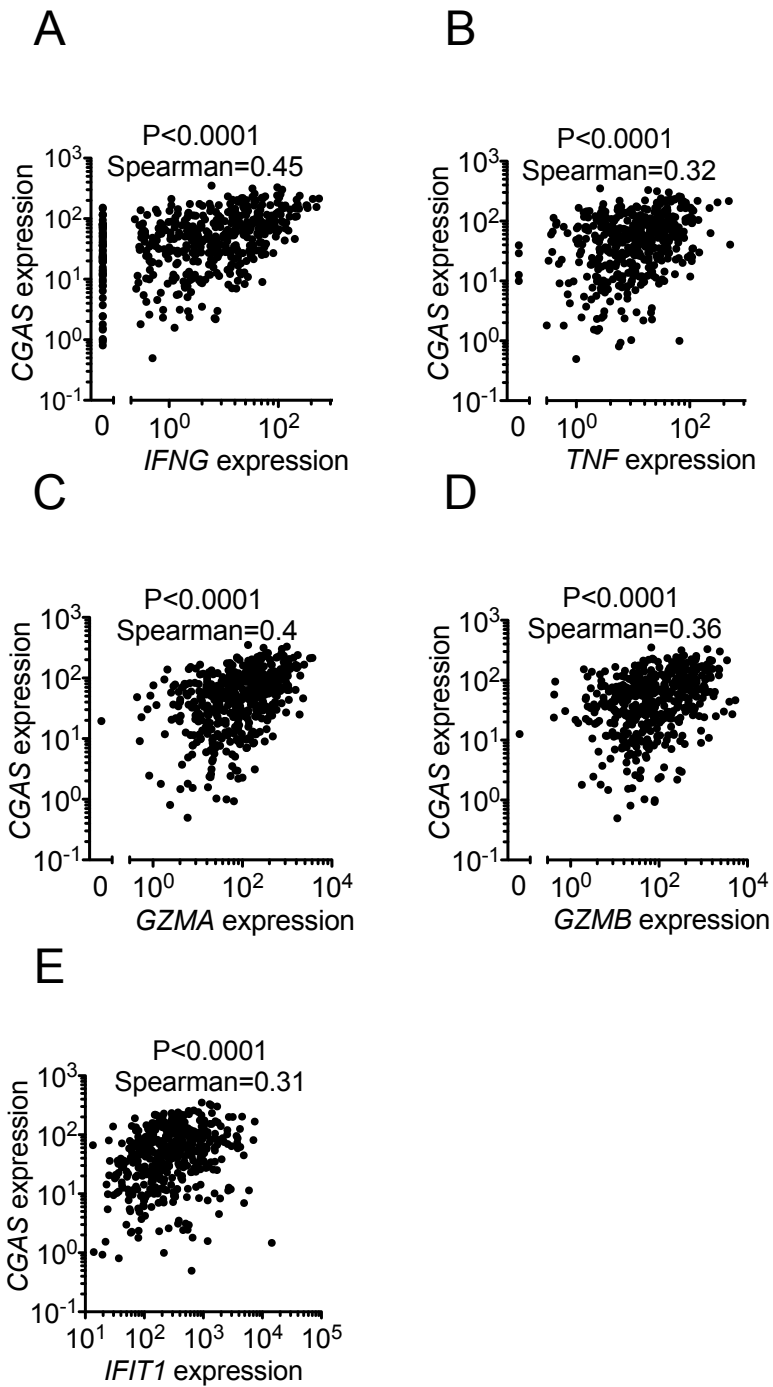

**Figure S4. Correlation between CGAS expression and immune activation in melanoma patients. Related to Figure 7.** Plots of expression of CGAS expression versus the immune activation markers *IFNG* (A), *TNF* (B), *GZMA* (C), *GZMB* (D), and *IFIT1* (E). All data were obtained from TCGA using the cBioportal website. Statistical correlation was assessed using the Spearman coefficient.

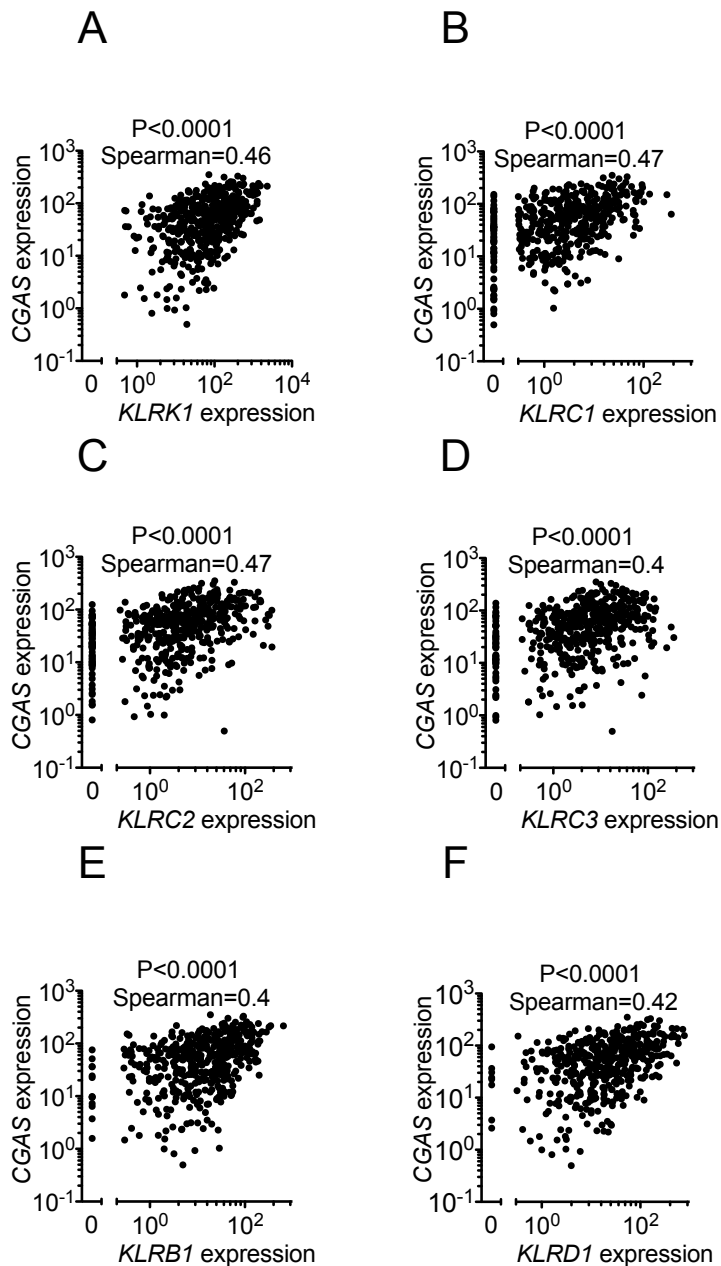

**Figure S5. Correlation between CGAS expression and NK cell infiltration in melanoma patients. Related to Figure 7.** Plots of expression of CGAS expression versus expression of the NK cell receptors *KLRK1* (A), *KLRC1* (B), *KLRC2* (C), *KLRC3* (D), *KLRB1* (E), and *KLRD1* (F). All data were obtained from TCGA using the cBioportal website. Statistical correlation was assessed using the Spearman coefficient.

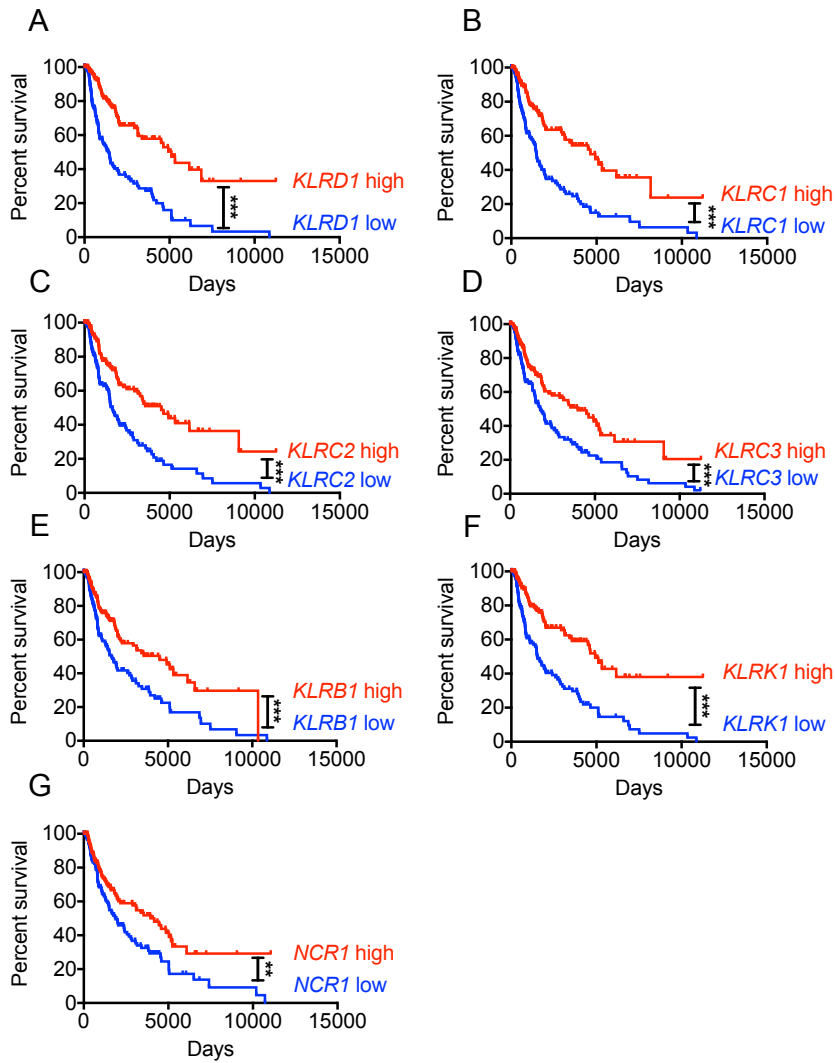

**Figure S6. Correlation between NK cell infiltration and survival in melanoma patients. Related to Figure 7.** Kaplan-Meier plots of melanoma patient survival. Patients were segmented by expression (highest and lowest thirds) of various NK cell receptors: *KLRD1* (A), *KLRC1* (B), *KLRC2* (C), *KLRC3* (D), *KLRB1* (E), *KLRK1* (F), and *NCR1* (G). Statistical analyses were performed using the log-rank test.

**Table S1.** List of forward and reverse primers used in qRT-PCR. Related to Star Methods

| Target                         | Forward (F)               | Reverse (R)            |
|--------------------------------|---------------------------|------------------------|
| <i>mActin</i>                  | AGAGGGAAATCGTGCGTGAC      | CAATAGTGATGACCTGGCCGT  |
| <i>mRpl19</i>                  | GGCAGTACCCTTCCTCTTCC      | AGCCTGTGACTGTCCATTCC   |
| <i>mCcl5</i>                   | GCTGCTTTGCCTACCTCTCC      | TCGAGTGACAAACACGACTGC  |
| <i>mIifit1</i>                 | CTGAGATGTCACTTCACATGGAA   | GTGCATCCCCAATGGGTTCT   |
| <i>mIifn<math>\beta</math></i> | TCCGAGCAGAGATCTTCAGGAA    | TGCAACCACCACTCATTCTGAG |
| <i>hCXCL10</i>                 | CCTTATCTTTCTGACTCTAAGTGGC | ACGTGGACAAAATTGGCTTG   |
| <i>hIFIT1</i>                  | ATCCACAAGACAGAATAGCCAG    | CCAGACTATCCTTGACCTGATG |
